# Supplementary material for: Evaluating the Effect of Azole Antifungal Agents on the Stress Response and Nanomechanical Surface Properties of Ochrobactrum anthropi Aspcl2.2
Source: MDPI journal article supplement (doi:10.3390/molecules25153348), 2020-07-23

Figure S1. Representative AFM height images showing morphological differences between (a) untreated control cells of *O. anthropi* AspCl2.2; cells exposed to: (b) fluconazole; (c) epoxiconazole; (d) climbazole; (e) clotrimazole.

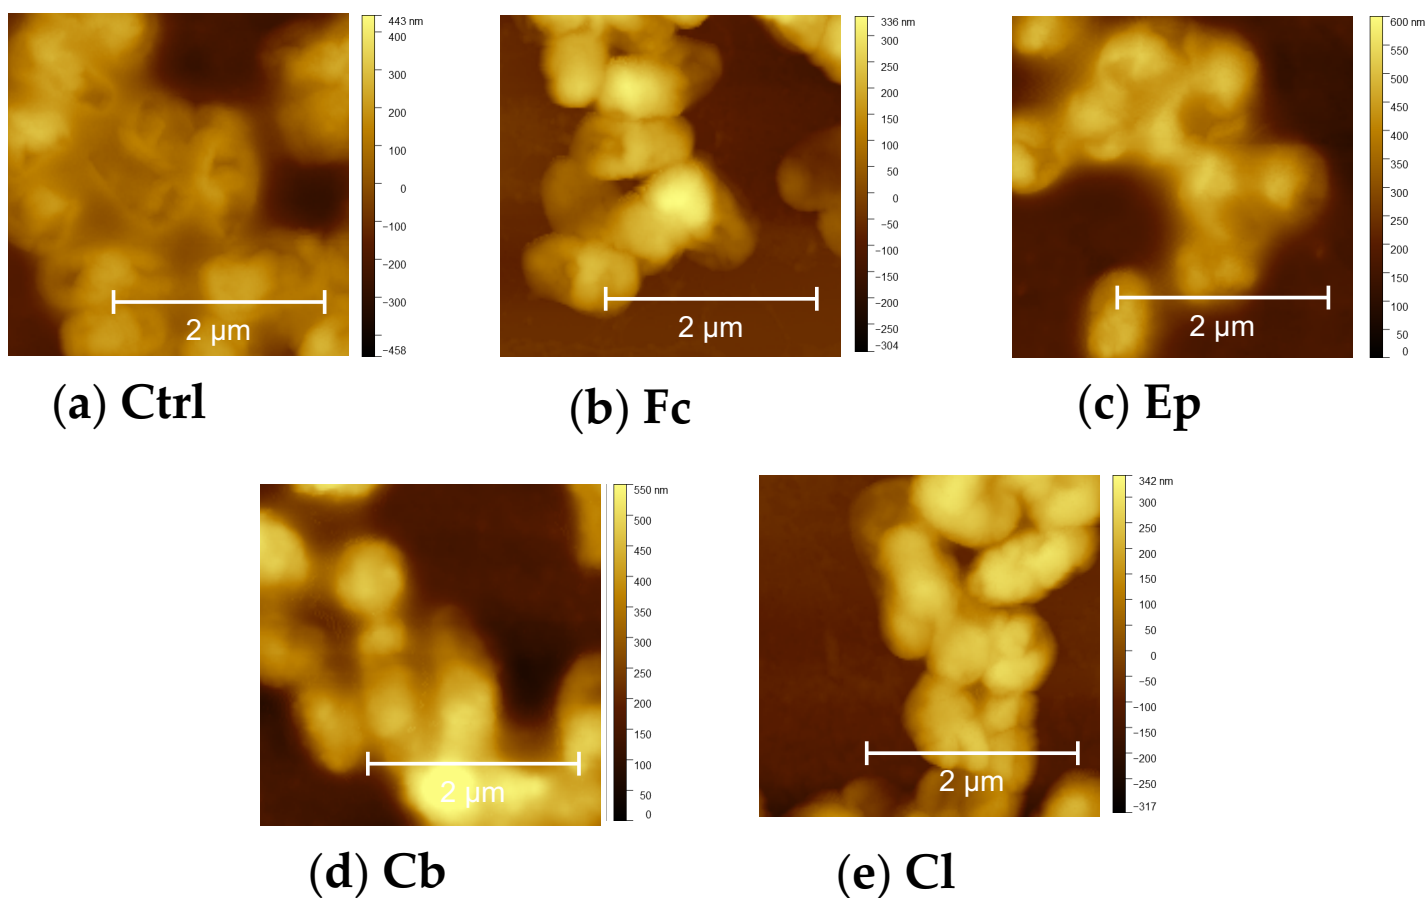

Supplement: s1 [file s1]
