# Supplementary material for: Evaluating the Effect of Azole Antifungal Agents on the Stress Response and Nanomechanical Surface Properties of Ochrobactrum anthropi Aspcl2.2
Source: MDPI journal article supplement (doi:10.3390/molecules25153348), 2020-07-23
Supplement: s1 [file s1]

Table S1. Summarizing table - the effects of each of the azoles on measured cell parameters.

|                                  | Parameter                   | Fc   | Ep   | Cb   | Cl   |
|----------------------------------|-----------------------------|------|------|------|------|
| <b>Oxidative stress response</b> | GSSG + GSH                  | ↑↑   | ↑↑   | ns   | ↑↑   |
|                                  | GSTs                        | ↑↑   | ns   | ↑↑   | ↓    |
| <b>Cell texture</b>              | Ra                          | ns   | ns   | ↓↓   | ns   |
|                                  | Rq                          | ns   | ns   | ↓↓   | ns   |
|                                  | R3z                         | ns   | ns   | ↓↓   | ns   |
| <b>Cell adhesion</b>             | Adhesion energy             | ↑↑↑↑ | ↑↑↑↑ | ↑↑↑↑ | ↑↑↑↑ |
|                                  | Adhesion force              | ↑↑↑  | ↑↑   | ↑↑↑  | ↑↑   |
|                                  | Cell surface hydrophobicity | ns   | ↓↓   | ↓↓   | ↓↓↓↓ |
| <b>Elastic properties</b>        | Deformation                 | ↑↑↑↑ | ↑↑↑  | ↑↑↑  | ↑↑↑↑ |
|                                  | Young's modulus             | ↓↓↓↓ | ↓↓↓  | ↓↓↓↓ | ↓↓↓↓ |
|                                  | Stiffness                   | ↓↓↓↓ | ↓↓   | ↓↓↓↓ | ↓↓↓↓ |

GSSG + GSH – the level of total glutathione; GSTs – activity of glutathione S-transferases;  
Ra – roughness average; Rq – root mean square roughness; R3z – average roughness depth.

- **ns** – the modification was not significant (vs. control sample)
- the direction of the arrows indicates up-/down-regulation
- the number of the arrows indicates the strengths of the modification:
  - I – increase/decrease by up to 1.0-fold (vs. control sample)
  - II – increase/decrease within the range from 1.1 to 2.0-fold (vs. control sample)
  - III – increase/decrease within the range from 2.1 to 3.0-fold (vs. control sample)
  - IIII – increase/decrease by at least 3.1-fold (vs. control sample)
