# Supplementary material for: Evaluating the Effect of Azole Antifungal Agents on the Stress Response and Nanomechanical Surface Properties of Ochrobactrum anthropi Aspcl2.2
Source: Molecules. 2020 Jul 23;25(15):3348. doi: 10.3390/molecules25153348 (PMC7435821; doi:10.3390/molecules25153348)
Supplement: Supplementary file 1 [file molecules-25-03348-s001.zip]

Archive with 12 entries (12 files):
- Table S1.pdf
- __MACOSX/._Table S1.pdf
- Table S1.docx
- __MACOSX/._Table S1.docx
- Figure S1.pdf
- __MACOSX/._Figure S1.pdf
- Figure S1.docx
- __MACOSX/._Figure S1.docx
- Appendix 1.pdf
- __MACOSX/._Appendix 1.pdf
- Appendix 1.docx
- __MACOSX/._Appendix 1.docx
